# Supplementary material for: Musical Engagement and Parent-Child Attachment in Families With Young Children During the Covid-19 Pandemic
Source: PubMed Central journal article supplement (PMC8019693; doi:10.3389/fpsyg.2021.641733), 2021-03-22
Supplement: Table_1.pdf [file Table_1.pdf]

## Supplement

**Table 1S**

*Correlations between child music activities and parent reasons for using music with their child*

|                                          | Sing   | Play    | Listen  | Toys    | Watch  | Dance   | Engage  |
|------------------------------------------|--------|---------|---------|---------|--------|---------|---------|
| Keep busy/pass the time while waiting    | 0.13   | 0.20*   | 0.22*   | 0.24*   | 0.10   | 0.22*   | 0.36*** |
| Interact with child in social games      | 0.27** | 0.30*** | 0.34*** | 0.35*** | 0.15   | 0.35*** | 0.45*** |
| Practice academic skills                 | 0.20*  | 0.31*** | 0.35*** | 0.34*** | 0.26** | 0.34*** | 0.32*** |
| Soothe child when upset                  | 0.18   | 0.24*   | 0.27**  | 0.20*   | 0.14   | 0.31*** | 0.43*** |
| As part of other routines                | 0.21*  | 0.28**  | 0.19    | 0.16    | 0.17   | 0.32*** | 0.37*** |
| Distract child                           | 0.12   | 0.26**  | 0.16    | 0.30*** | 0.24*  | 0.27**  | 0.35*** |
| As part of nighttime routine             | 0.12   | 0.18    | 0.16    | 0.06    | -0.02  | 0.20*   | 0.25**  |
| Practice communication skills            | 0.19   | 0.31*** | 0.15    | 0.28**  | 0.24*  | 0.25**  | 0.28**  |
| Get child's attention                    | 0.14   | 0.28**  | 0.06    | 0.32*** | 0.16   | 0.28**  | 0.32*** |
| Help with transitions between activities | 0.06   | 0.17*   | 0.22*   | 0.28*** | 0.09   | 0.28**  | 0.30*** |

*Note.* All correlations control for child age

\* $p < 0.01$  \*\* $p < 0.001$  \*\*\* $p < 0.0001$

**Table 2S**

*Correlations between parent-child attachment and Music@Home Subscales, child music activities, and parent reasons for using music with their child*

|                                          | Parent-Child Attachment |
|------------------------------------------|-------------------------|
| Music@Home                               |                         |
| Child Active Engagement                  | 0.16                    |
| Parent Initiation of Music Activities    | 0.26**                  |
| Child Music Activities                   |                         |
| Singing                                  | 0.15                    |
| Playing instruments                      | 0.31***                 |
| Listening to music                       | 0.19                    |
| Musical toys                             | 0.13                    |
| Watching musical videos                  | -0.02                   |
| Dancing to music                         | 0.29**                  |
| Engaging in music socially               | 0.29***                 |
| Parent Reasons for Using Music           |                         |
| Keep busy/pass the time while waiting    | 0.24*                   |
| Interact with child in social games      | 0.21*                   |
| Practice academic skills                 | 0.20*                   |
| Soothe child when upset                  | 0.21*                   |
| As part of other routines                | 0.19                    |
| Distract child                           | 0.13                    |
| As part of nighttime routine             | 0.08                    |
| Practice communication skills            | 0.13                    |
| Get child's attention                    | 0.22*                   |
| Help with transitions between activities | 0.17                    |

*Note.* All correlations control for child age, parent education, parent distress, and parenting self-efficacy

\* $p < 0.01$  \*\* $p < 0.001$  \*\*\* $p < 0.0001$
